# Supplementary material
Source: PubMed Central journal article supplement (PMC6641243)
Supplement: ao7b01503_si_001.pdf [file ao7b01503_si_001.pdf]

## Supporting Information

### **Noncovalent Approach to Liquid-Crystalline Ion Conductors: High-Rate Performances and Room Temperature Operation for Li-Ion Batteries**

Taira Onuma,<sup>†</sup> Eiji Hosono<sup>\*,‡</sup>, Motokuni Takenouchi,<sup>†</sup> Junji Sakuda,<sup>†</sup> Satoshi Kajiyama,<sup>†</sup> Masafumi Yoshio,<sup>†</sup> and Takashi Kato<sup>\*,†</sup>

<sup>†</sup>Department of Chemistry and Biotechnology, School of Engineering, The University of Tokyo Hongo, Bunkyo-ku, Tokyo 113-8656, Japan

<sup>‡</sup>Research Institute for Energy Conservation, National Institute of Advanced Industrial Science and Technology, Umezono, Tsukuba, Ibaraki 305-8568, Japan

#### **Corresponding Authors**

\*E-mail: e-hosono@aist.go.jp (E.H.).

\*E-mail: kato@chiral.t.u-tokyo.ac.jp (T.K.).

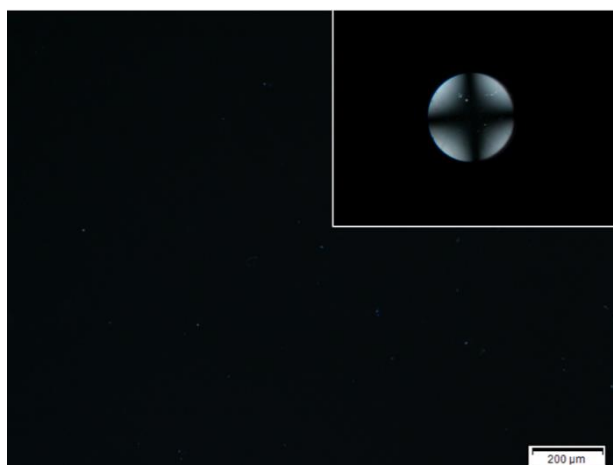

**Figure S1.** Polarizing optical microscopic image of **1**/EC(29) at 25 °C in the homeotropically aligned smectic A phase. The inset shows the conoscopic image.

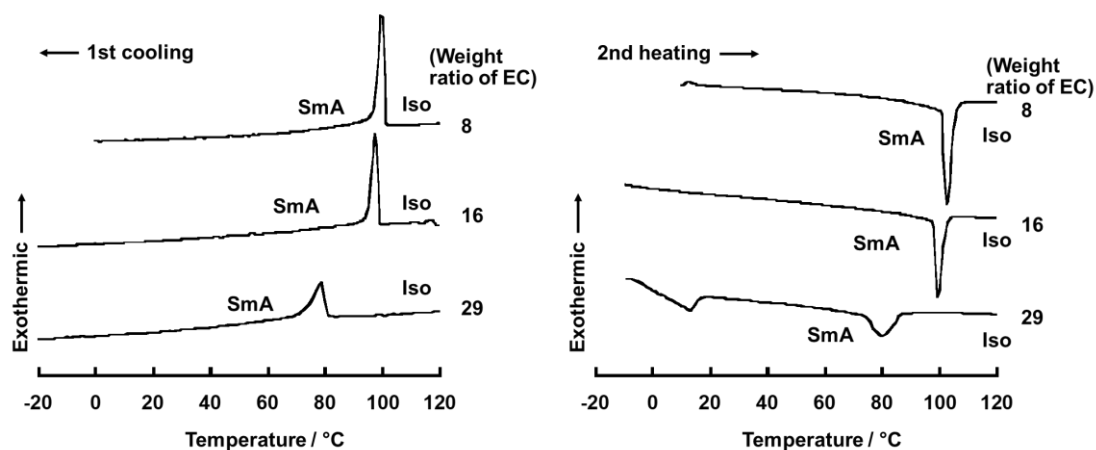

**Figure S2.** DSC thermograms of the mixtures of **1**, EC, and LiTFSI on 1<sup>st</sup> cooling (left) and 2<sup>nd</sup> heating (right) at a scanning rate of 10 K min<sup>-1</sup>. Iso: isotropic; SmA: smectic A.

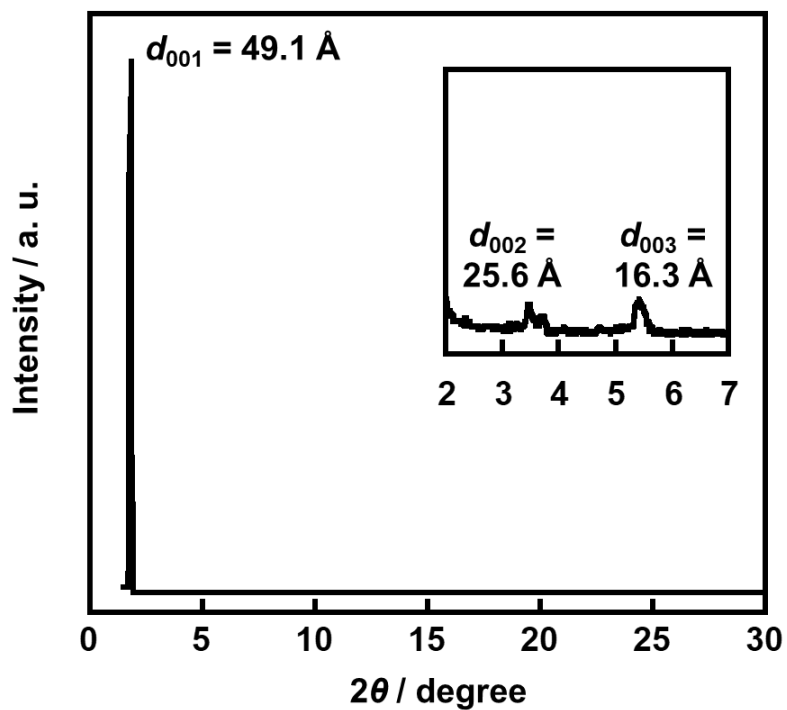

**Figure S3.** X-ray diffraction pattern of 1/EC(29) at 60 °C.

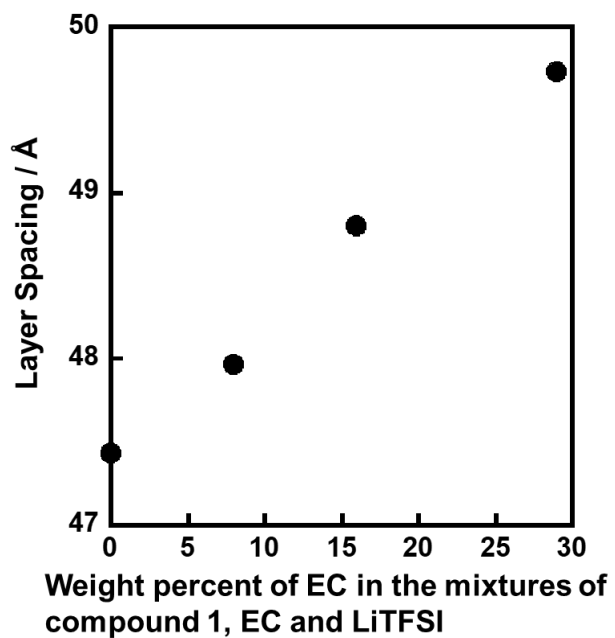

**Figure S4.** Interlayer spacings of the smectic structures of the mixtures of different weight ratios of EC at 60 °C.

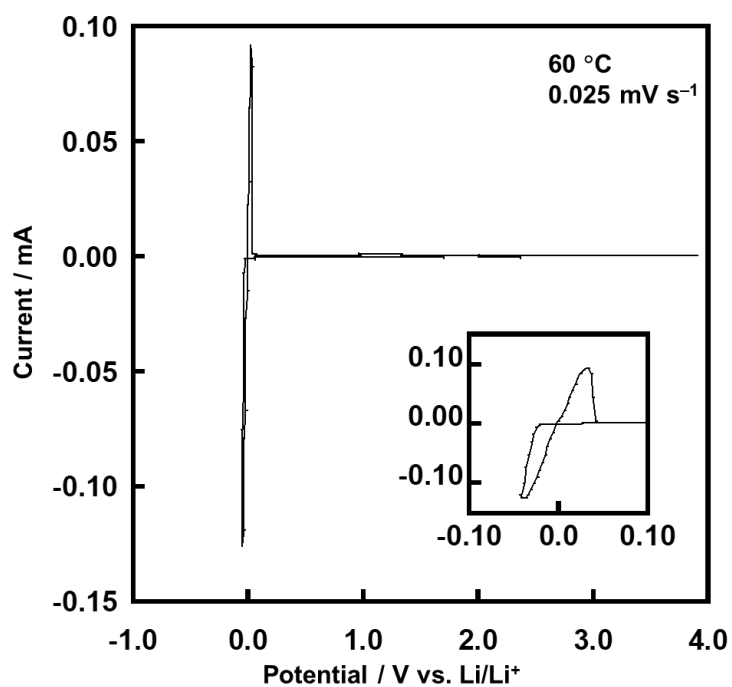

**Figure S5.** Cyclic voltammogram for the cell composed of Li metal/LC electrolyte (1/EC(29))/stainless-steel (SUS316L) in the potential range from  $-0.04$  to  $3.9$  V versus  $\text{Li/Li}^+$  at the scan rate of  $0.025 \text{ mV s}^{-1}$  at  $60 \text{ }^\circ\text{C}$ .
